# Supplementary material for: In[Ba3Cl3F6]: a novel infrared-transparent molecular sieve constructed by halides
Source: Royal Society of Chemistry journal article supplement (doi:10.1039/d0cc00455c), 2020-01-01
Supplement: d0cc00455c1.pdf [file d0cc00455c1.pdf]

## Supporting Information

### **In[Ba<sub>3</sub>Cl<sub>3</sub>F<sub>6</sub>]: A Novel Infrared-Transparent Molecular Sieve**

#### **Constructed by Halides**

Xiaoqing Jiang,<sup>a</sup> Hongping Wu,<sup>a</sup> Hongwei Yu,<sup>a,\*</sup> Zhanggui Hu,<sup>a</sup> jiyang wang,<sup>a</sup>  
Yicheng Wu<sup>a</sup>

<sup>a</sup>Tianjin Key Laboratory of Functional Crystal Materials, Institute of Functional Crystals, Tianjin University of Technology, Tianjin 300384, China.

## CONTENTS

**Section S1.** Synthesis and characterization.

**Table S1.** Crystal data and structure refinement for  $\text{In}[\text{Ba}_3\text{Cl}_3\text{F}_6]$ .

**Table S2.** Atomic coordinates ( $\times 10^4$ ) and equivalent isotropic displacement parameters ( $\text{\AA}^2 \times 10^3$ ) for  $\text{In}[\text{Ba}_3\text{Cl}_3\text{F}_6]$ .

**Table S3.** Selected bond distances ( $\text{\AA}$ ) and angles (deg) for  $\text{In}[\text{Ba}_3\text{Cl}_3\text{F}_6]$ .

**Figure S1.** Simulated and measured powder X-ray diffraction patterns of  $\text{In}[\text{Ba}_3\text{Cl}_3\text{F}_6]$ .

**Figure S2.** Scanning Electron Microscope (SEM) image of  $\text{In}[\text{Ba}_3\text{Cl}_3\text{F}_6]$  and its elemental distribution maps.

**Figure S3.** Energy Dispersive Spectrometer (EDS) of  $\text{In}[\text{Ba}_3\text{Cl}_3\text{F}_6]$ .

**Figure S4.** The structure of  $\text{In}[\text{Ba}_3\text{Cl}_3\text{F}_6]$  viewed along the c-axis.

## **Section S1 Synthesis and characterization**

### **1. Synthesis of In[Ba<sub>3</sub>Cl<sub>3</sub>F<sub>6</sub>] crystal.**

BaCl<sub>2</sub>·2H<sub>2</sub>O (99.5%), In<sub>2</sub>O<sub>3</sub> (99.99%), and H<sub>5</sub>IO<sub>6</sub> (99%) were obtained analytically pure from TianJin Fuchen, aladdin and aladdin respectively and used without any further purification. In[Ba<sub>3</sub>Cl<sub>3</sub>F<sub>6</sub>] was prepared by the mild hydrothermal method using BaCl<sub>2</sub>·2H<sub>2</sub>O (1.6 g, 8 mmol), In<sub>2</sub>O<sub>3</sub> (0.2 g, 1 mmol), H<sub>5</sub>IO<sub>6</sub> (0.2 g, 1 mmol), 1ml HF (48%) and 3 mL deionized water. The mixture was stirred at room temperature for 30 minutes. Then it was sealed into a 30 mL teflon autoclave, heated to 220 °C in 3 hours and kept this temperature for 3 days. It was further slowly cooled to ambient temperature at a rate of 3 °C/h. Some high quality crystals were obtained and washed with deionized water and dried in air for single crystal structure determination. The X-ray powder diffraction patterns for In[Ba<sub>3</sub>Cl<sub>3</sub>F<sub>6</sub>] are shown in Figure S1.

### **2. Synthesis of In[Ba<sub>3</sub>Cl<sub>3</sub>F<sub>6</sub>] powder.**

The method of synthesizing In[Ba<sub>3</sub>Cl<sub>3</sub>F<sub>6</sub>] powder is solid phase synthesis. The raw materials are BaF<sub>2</sub> (99%) and InCl<sub>3</sub>·4H<sub>2</sub>O (99.9%) from aladdin. BaF<sub>2</sub> (3.21 g, 3 mmol) and InCl<sub>3</sub>·4H<sub>2</sub>O (1.790 g, 1 mmol) were mixed and ground completely. Then the mixture was put in the muffle. The experimental process is heated to 300 °C in 50 minutes maintain the temperature for 5 h, and then slowly cooled to ambient temperature. In this way, we can obtain the powder. The X-ray powder diffraction pattern for

In[Ba<sub>3</sub>Cl<sub>3</sub>F<sub>6</sub>] powder is shown in Figure S1.

### **3. Instruments and Methods.**

#### **Powder X-ray Diffraction.**

The powder X-ray diffraction (XRD) data are collected using a PIGAKV Smart Lab 9KW with monochromatic Mo K $\alpha$  radiation ( $\lambda = 1.5418 \text{ \AA}$ ) at room temperature. The  $2\theta$  range is from 5 to 50° with a scan step width of 0.01° and a fixed counting time of 1.5 s per step. The powder XRD patterns of compounds are shown in Figure S1. Clearly, they are in agreement with the calculated pattern.

#### **Energy-dispersive X-ray spectroscopy.**

Micro probe elemental analyses and the elemental distribution maps were measured on a field-emission scanning electron microscope (FESEM, Quanta FEG 250) made by FEI (Figures S2 and S3).

#### **Thermal Analysis.**

The thermal behavior of In[Ba<sub>3</sub>Cl<sub>3</sub>F<sub>6</sub>] was investigated by a simultaneous NETZSCH STA thermal analyzer instrument under the flow of N<sub>2</sub>. The sample was enclosed in Al<sub>2</sub>O<sub>3</sub> crucible and heated from 35 °C to 1300 °C at a rate of 10 °C /min.

#### **Optical Measurement.**

The IR spectrum was measured on Nicolet™ Continuum™ IR Microscope and Nicolet iS50 FTIR Spectrometer made by Thermo-Fisher Business. The sample was put on the sample stage, and the spectrum was

collected in the range of 4000-400  $\text{cm}^{-1}$ . The UV–VIS–NIR diffuse reflectance data for the monocrystal powder of  $\text{In}[\text{Ba}_3\text{Cl}_3\text{F}_6]$  was collected at room temperature using a UH4150 UV/VIS/NIR spectrophotometer with the measurement range extending from 300 to 2500 nm. Reflectance spectrum was converted to absorbance using the function  $F(R)=\alpha/s=(1-R)^2/2R$  ( $\alpha$  is absorbance,  $s$  is reflection coefficient), where  $R$  is the reflectance and  $F(R)$  is the Kubelka–Munk remission function.<sup>1</sup> The straightforward extrapolation method was used to deduce the band gap.<sup>2</sup> X-axis is  $E=h\nu=hc/\lambda$  ( $hc=1240$ ), ( $h$  is Planck constant,  $\nu$  is Gamma frequency). Y-axis is  $F(R)$ .

### **Textural properties of $\text{In}[\text{Ba}_3\text{Cl}_3\text{F}_6]$ .**

The specific surface area and pore size distribution of the samples were measured by the physical adsorption apparatus of Autosorb-IQ3+chem Star made by Quanta-chrome in America. The data was collected in the  $\text{N}_2$  atmosphere. The quality of the sample is 0.0596 g. The bath temperature is 77.35 K.

### **Single Crystal Structure Determination.**

Single-crystal X-ray diffraction data for the compound was collected on the XtaLab Pro MM003Cu/Mo made by RIGAKU with  $\text{Mo K}\alpha$  radiation ( $\lambda=0.71073 \text{ \AA}$ ) at 277 K. Data reduction was performed with CrysAlisPro, and absorption correction based on the multi-scan method was applied.<sup>3</sup> It was determined by the direct method refined by full-matrix least-squares

fitting on  $F^2$  using SHELXL-97.<sup>4</sup> All of the non-hydrogen atoms were refined with anisotropic thermal parameters.<sup>5</sup> Crystallographic data and structural refinement of the compound are listed in Table S1, the atomic coordinates and equivalent isotropic displacement parameters for  $\text{In}[\text{Ba}_3\text{Cl}_3\text{F}_6]$  are listed in Table S2. the selected bond distances and angles (deg) for  $\text{In}[\text{Ba}_3\text{Cl}_3\text{F}_6]$  are listed in Table S3.

**Table 1. Crystal data and structure refinement for In[Ba<sub>3</sub>Cl<sub>3</sub>F<sub>6</sub>].**

| Empirical formula                                                                               | In[Ba <sub>3</sub> Cl <sub>3</sub> F <sub>6</sub> ] |
|-------------------------------------------------------------------------------------------------|-----------------------------------------------------|
| Temperature                                                                                     | 293(2) K                                            |
| Wavelength                                                                                      | 0.71073 nm                                          |
| Crystal system                                                                                  | Trigonal                                            |
| Space group                                                                                     | <i>P</i> 6 <sub>3</sub> / <i>m</i>                  |
| Unit cell dimensions                                                                            | a=10.1310(4) Å<br>c=5.9315(3) Å                     |
| Z, Volume                                                                                       | 2, 527.23(4) Å <sup>3</sup>                         |
| Formula weight                                                                                  | 149.44                                              |
| Calculated density                                                                              | 2.353 mg/m <sup>3</sup>                             |
| Absorption coefficient                                                                          | 7.003 mm <sup>-1</sup>                              |
| F(000)                                                                                          | 322                                                 |
| Crystal size                                                                                    | 0.2974 × 0.101 × 0.03996 mm <sup>3</sup>            |
| Theta range for data collection                                                                 | 4.02 to 29.65                                       |
| Limiting indices                                                                                | -11 ≤ h ≤ 13, -12 ≤ k ≤ 12, -7 ≤ l ≤ 8              |
| Reflections collected / unique                                                                  | 210 / 209<br>[R(int)=0.030]                         |
| Completeness to theta=27.69                                                                     | 99.5%                                               |
| Data / restraints / parameters                                                                  | 517 / 0 / 25                                        |
| Goodness-of-fit on F <sup>2</sup>                                                               | 1.249                                               |
| Final R indices [F <sub>o</sub> <sup>2</sup> > 2σ(F <sub>o</sub> <sup>2</sup> )] <sup>[a]</sup> | R <sub>1</sub> =0.0194<br>wR <sub>2</sub> =0.0413   |
| R indices (all data) <sup>[a]</sup>                                                             | R <sub>1</sub> =0.0212<br>wR <sub>2</sub> =0.0419   |
| Extinction coefficient                                                                          | 0.0604(17)                                          |
| Largest diff. peak and hole                                                                     | 1.21 and -1.27 e <sup>-</sup> Å <sup>-3</sup>       |

<sup>[a]</sup>R<sub>1</sub> = Σ||F<sub>o</sub>| - |F<sub>c</sub>||/Σ|F<sub>o</sub>| and wR<sub>2</sub> = [Σw(F<sub>o</sub><sup>2</sup> - F<sub>c</sub><sup>2</sup>)<sup>2</sup> / Σw F<sub>o</sub><sup>4</sup>]<sup>1/2</sup> for F<sub>o</sub><sup>2</sup> > 2σ(F<sub>o</sub><sup>2</sup>)

**Table S2.** Atomic coordinates ( $\times 10^4$ ) and equivalent isotropic displacement parameters ( $\text{\AA}^2 \times 10^3$ ) for  $\text{In}[\text{Ba}_3\text{Cl}_3\text{F}_6]$ .  $U_{\text{eq}}$  is defined as one-third of the trace of the orthogonalized  $U_{ij}$  tensor.

| Atom  | x        | y       | z      | $U_{\text{eq}}$ | BVS   |
|-------|----------|---------|--------|-----------------|-------|
| Ba(1) | 7017(1)  | 6138(1) | 2500   | 10(1)           | 2.137 |
| In(1) | 3333     | 6667    | 2500   | 9(1)            | 3.064 |
| Cl(1) | 10612(1) | 7906(1) | 2500   | 19(1)           | 1.095 |
| F(1)  | 3685(2)  | 8374(2) | 190(3) | 15(1)           | 0.94  |



**Table S3.** Selected bond distances (Å) and angles (deg) for In[Ba<sub>3</sub>Cl<sub>3</sub>F<sub>6</sub>].

|                |            |                       |            |
|----------------|------------|-----------------------|------------|
| Ba(1)-F(1)#1   | 2.7233(18) | F(1)#1-Ba(1)-F(1)#2   | 71.74(7)   |
| Ba(1)-F(1)#2   | 2.7233(18) | F(1)#1-Ba(1)-F(1)#3   | 66.58(6)   |
| Ba(1)-F(2)#3   | 2.8100(19) | F(1)#2-Ba(1)-F(1)#3   | 100.02(4)  |
| Ba(1)-F(2)#4   | 2.8100(19) | F(1)#1-Ba(1)-F(1)#4   | 100.02(4)  |
| Ba(1)-F(3)#5   | 2.9342(18) | F(1)#2-Ba(1)-F(1)#4   | 66.58(6)   |
| Ba(1)-F(3)#6   | 2.9342(18) | F(1)#3-Ba(1)-F(1)#4   | 58.36(7)   |
| Ba(1)-Cl(1)#7  | 3.1500(5)  | F(1)#1-Ba(1)-F(1)#5   | 95.98(7)   |
| Ba(1)-Cl(1)#8  | 3.1500(5)  | F(1)#2-Ba(1)-F(1)#5   | 57.78(7)   |
| Ba(1)-Cl(2)    | 3.1544(11) | F(1)#3-Ba(1)-F(1)#5   | 156.24(6)  |
| Ba(1)-Cl(3)#9  | 3.1610(12) | F(1)#4-Ba(1)-F(1)#5   | 112.637(5) |
| Ba(1)-In(1)#10 | 3.9986(2)  | F(1)#1-Ba(1)-F(1)#6   | 57.78(7)   |
| Ba(1)-In(1)#11 | 3.9986(2)  | F(1)#2-Ba(1)-F(1)#6   | 95.98(7)   |
| In(1)-F(1)#12  | 2.0926(18) | F(1)#3-Ba(1)-F(1)#6   | 112.637(5) |
| In(1)-F(1)#13  | 2.0926(18) | F(1)#4-Ba(1)-F(1)#6   | 156.24(6)  |
| In(1)-F(1)     | 2.0926(18) | F(1)#5-Ba(1)-F(1)#6   | 65.89(7)   |
| In(1)-F(1)#14  | 2.0926(18) | F(1)#1-Ba(1)-Cl(3)#7  | 145.48(4)  |
| In(1)-F(1)#4   | 2.0926(18) | F(1)#2-Ba(1)-Cl(3)#7  | 73.77(4)   |
| In(1)-F(1)#3   | 2.0926(18) | F(1)#3-Ba(1)-Cl(3)#7  | 121.90(4)  |
| In(1)-Ba(1)#15 | 3.9986(2)  | F(1)#4-Ba(1)-Cl(3)#7  | 67.07(4)   |
| In(1)-Ba(1)#7  | 3.9986(2)  | F(1)#5-Ba(1)-Cl(3)#7  | 63.61(4)   |
| In(1)-Ba(1)#16 | 3.9986(2)  | F(1)#6-Ba(1)-Cl(3)#7  | 125.42(4)  |
| In(1)-Ba(1)#8  | 3.9986(2)  | F(1)#1-Ba(1)-Cl(3)#8  | 73.77(4)   |
| In(1)-Ba(1)#10 | 3.9986(2)  | F(1)#2-Ba(1)-Cl(3)#8  | 145.48(4)  |
| In(1)-Ba(1)#11 | 3.9986(2)  | F(1)#3-Ba(1)-Cl(3)#8  | 67.07(4)   |
| Cl(1)-Ba(1)#1  | 3.1500(4)  | F(1)#4-Ba(1)-Cl(3)#8  | 121.90(4)  |
| Cl(1)-Ba(1)#17 | 3.1500(4)  | F(1)#5-Ba(1)-Cl(3)#8  | 125.42(4)  |
| Cl(3)-Ba(1)#18 | 3.1610(12) | F(1)#6-Ba(1)-Cl(3)#8  | 63.61(4)   |
| F(1)-Ba(1)#8   | 2.7233(17) | Cl(3)#7-Ba(1)-Cl(3)#8 | 140.61(4)  |

|               |            |                    |           |
|---------------|------------|--------------------|-----------|
| F(2)-Ba(1)#13 | 2.8100(19) | F(1)#1-Ba(1)-Cl(3) | 122.95(4) |
| F(3)-Ba(1)#15 | 2.9342(18) | F(1)#2-Ba(1)-Cl(3) | 122.95(4) |

Symmetry transformations used to generate equivalent atoms:

- #1  $x-y+1, x, -z$     #2  $x-y+1, x, z+1/2$     #3  $-x+y, -x+1, z$     #4  $-x+y, -x+1, -z+1/2$   
#5  $y, -x+y, z+1/2$     #6  $y, -x+y, -z$     #7  $y, -x+y+1, -z+1$     #8  $y, -x+y+1, -z$   
#9  $-x+y+1, -x+2, z$     #10  $-x+1, -y+1, -z$     #11  $-x+1, -y+1, -z+1$     #12  $x, y, -z+1/2$   
#13  $-y+1, x-y+1, z$     #14  $-y+1, x-y+1, -z+1/2$     #15  $x-y, x, -z$     #16  $x-y, x, -z+1$   
#17  $x-y+1, x, -z+1$     #18  $-y+2, x-y+1, z$

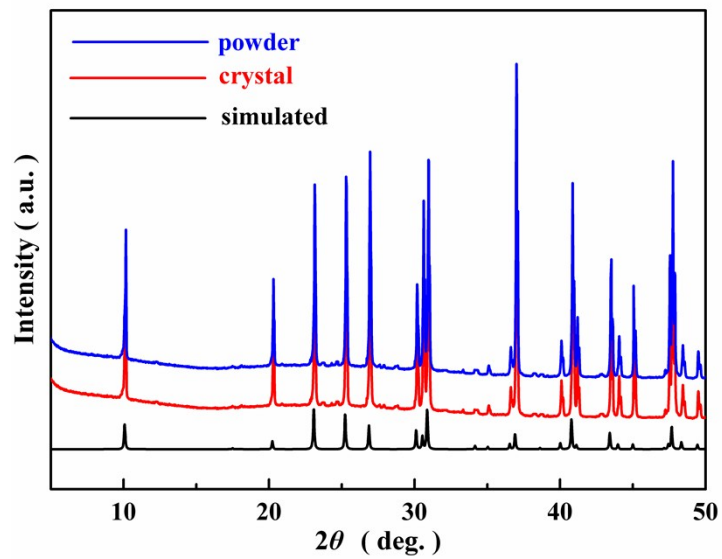

**Figure S1.** Simulated and measured powder X-ray diffraction patterns of  $\text{In}[\text{Ba}_3\text{Cl}_3\text{F}_6]$ .

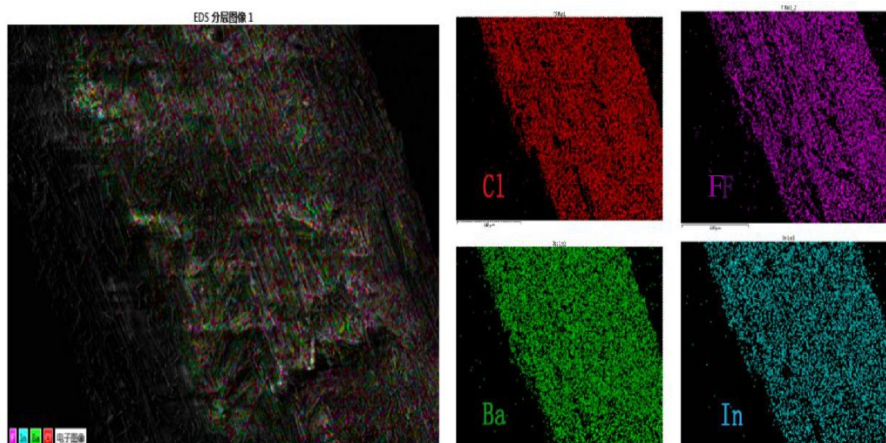

**Figure S2.** Scanning Electron Microscope (SEM) image of  $\text{In}[\text{Ba}_3\text{Cl}_3\text{F}_6]$  and its elemental distribution maps.

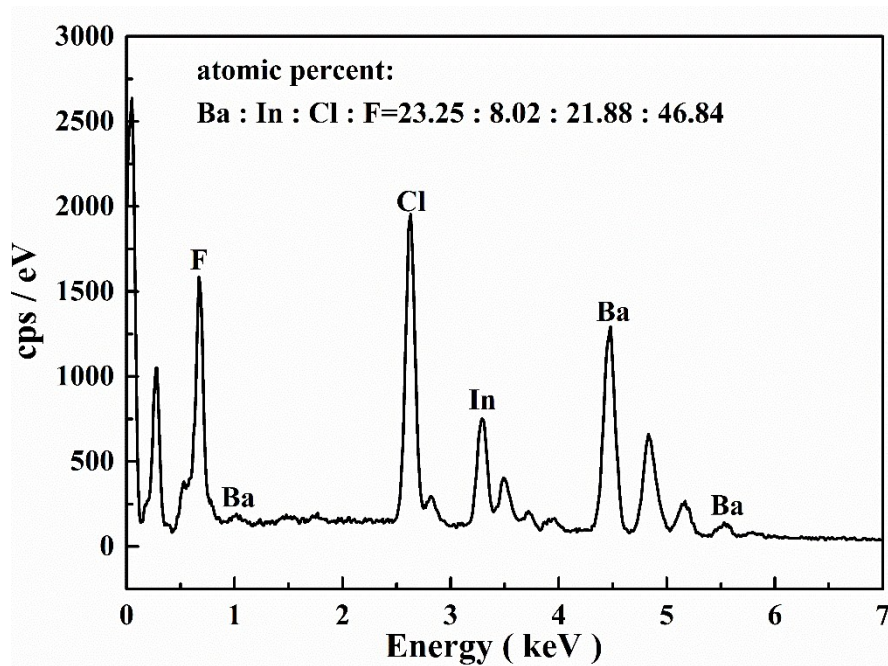

Figure S3. Energy Dispersive Spectrometer (EDS) of In[Ba<sub>3</sub>Cl<sub>3</sub>F<sub>6</sub>].

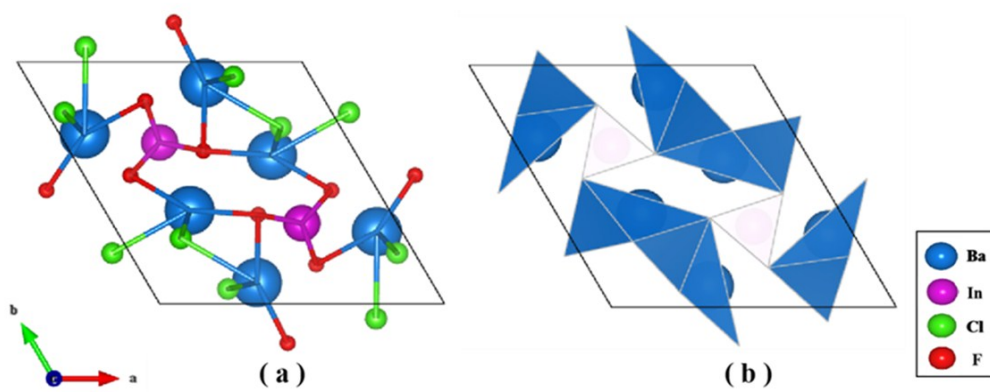

**Figure S4.** The structure of  $\text{In}[\text{Ba}_3\text{Cl}_3\text{F}_6]$  viewed along the  $c$ -axis.

## REFERENCES

1. P. Kubelka, F. Munk, *Z. Tech, Physical.*, 1931, **12**, 886-892.
2. S. Tandon, J. Gupta, *Phys. Status. Solidi.*, 1970, **38**, 363-367.
3. R. H. Blessing, *Acta. Crystallogr. A.*, 1995, **51**, 33-38.
4. G. M. Sheldrick, *Acta. Crystallogr. Sect. A.*, 1998.
5. D. Cruickshank, *Acta. Crystallogr.*, 1956, **9**, 747-753.
